# Supplementary material for: CCL25/CCR9 interaction promotes the malignant behavior of salivary adenoid cystic carcinoma via the PI3K/AKT signaling pathway
Source: PeerJ. 2022 Aug 19;10:e13844. doi: 10.7717/peerj.13844 (PMC9394511; doi:10.7717/peerj.13844)
Supplement: Supplemental Information 3 [file peerj-10-13844-s003.docx]

**Supplemental Table 3**

**Table S3 Primer sequence of the target genes**

| **Gene** | | Forward Primer 5’-3’ | Reverse Primer 5’-3’ |
| --- | --- | --- | --- |
| **Human**  **origin** | CCR9 | AGAGTGAAGACCATGACCGACA | GGCGGAATCTCTCACCCACAAA |
| vimentin | GACGCCATCAACACCGAGTT | GACGCCATCAACACCGAGTT |
| MMP2 | AAGTCTGAAGAGCGTGAAGTTTGGA | TGAGGGTTGGTGGGATTGGAG |
| MMP9 | AGTCCACCCTTGTGCTCTTCCC | TCTGCCACCCGAGTGTAACCAT |
| SLUG | TCTGCCACCCGAGTGTAACCAT | GAGAGGCCATTCGGTAGCTG |
| SNAIL1 | CACTATGCCGCGCTCTTTC | CACTATGCCGCGCTCTTTC |
| TWIST | GTCCGCAGTCTTACGAGGAG | GCTTGAGGGTCTGAATCTTGCT |
| cyclinD1 | GCTTGAGGGTCTGAATCTTGCT | GTCACACTTGATCACTCTGG |
| Ki67 | TTTGGGTGCGACTTGACG | GATAGTAACCAGGCGTCTCG |
| c-Myc | GTCACACTTGATCACTCTGG | CTTTTCCACAGAAACAACATCG |
| BCL-2 | CTTTTCCACAGAAACAACATCG | GAGACAGCCAGGAGAAATCAA |
| BAX | TTTGCTTCAGGGTTTCATCCA | GAGACACTCGCTCAGCTTCTTG |
| caspase 3 | AACTGGACTGTGGCATTGAG | AACTGGACTGTGGCATTGAG |
| GAPDH | CTCCTCCTGTTCGACAGTCAGC | CTCCTCCTGTTCGACAGTCAGC |
| **Mouse**  **origin** | vimentin | AAAGCGTGGCTGCCAAGAA | ACCTGTCTCCGGTACTCGTTTGA |
| BCL-2 | CCTGTGGATGACTGAGTACCTG | AGCCAGGAGAAATCAAACAGAGG |
| cyclinD1 | CATGACCAGTGTGACTCAAAGCAA | CTCAGACATGGCCCTAAACCTTC |
| E-cadherin | GGTCATCAGTGTGCTCACCTCT | GCTGTTGTGCTCAAGCCTTCAC |
| MMP2 | AGAACTTCCGATTATCCCATGATGA | TGACAGGTCCCAGTGTTGGTG |
| MMP9 | GCCCTGGAACTCACACGACA | TTGGAAACTCACACGCCAGAAG |
| SLUG | CTGGCTGCTTCAAGGACACATTAG | TGCAGAAGCGACATTCTGGAG |
| GAPDH | CATCACTGCCACCCAGAAGACTG | ATGCCAGTGAGCTTCCCGTTCAG |
